# Supplementary material
Source: PubMed Central journal article supplement (PMC11257029)

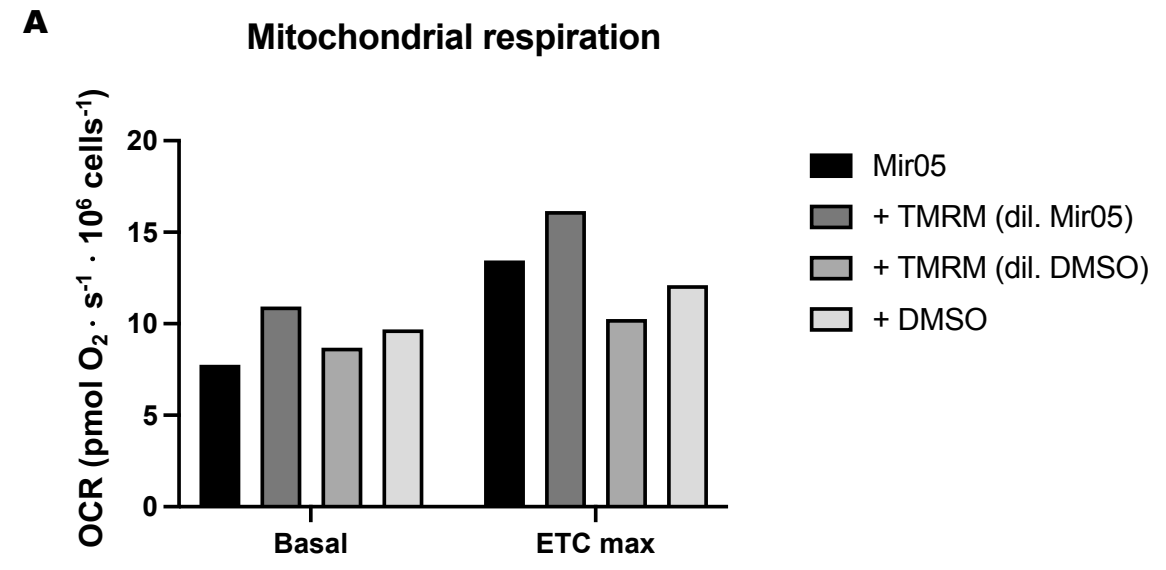

Supplement: NIHMS2004120-supplement-Supplemental_Figure.pdf [file NIHMS2004120-supplement-Supplemental_Figure.pdf]
